# Supplementary material for: Free Bilirubin Induces Neuro-Inflammation in an Induced Pluripotent Stem Cell-Derived Cortical Organoid Model of Crigler-Najjar Syndrome
Source: Cells. 2023 Sep 14;12(18):2277. doi: 10.3390/cells12182277 (PMC10527749; doi:10.3390/cells12182277)
Supplement: Supplementary file 1 [file cells-12-02277-s001.zip]

Archive with 15 entries (15 files):
- Revised Supplementary Figure Legend.pdf
- Supplementary Fig 1.png
- Supplementary Fig 2.jpg
- Supplementary Fig 3.png
- Supplementary Fig 4.png
- Supplementary Fig 5.png
- Supplementary File 1.xlsx
- Supplementary File 2.xlsx
- Supplementary File 3.xlsx
- Supplementary File 4.xlsx
- supplementary File.5.pdf
- Table S1.xlsx
- Table S2.xlsx
- Table S3.xlsx
- Table S4.xlsx
