# Supplementary material for: Free Bilirubin Induces Neuro-Inflammation in an Induced Pluripotent Stem Cell-Derived Cortical Organoid Model of Crigler-Najjar Syndrome
Source: Cells. 2023 Sep 14;12(18):2277. doi: 10.3390/cells12182277 (PMC10527749; doi:10.3390/cells12182277)
Supplement: Supplementary file 1 [file cells-12-02277-s001.zip › Table S1.xlsx]

## Sheet: Tabelle1
Table S 1: Information of the used iPS-cell lines
	Healthy Line (UM51)	Patient Line (i705-C2)
Sex	Male	Male
Age	51	Unknown
Ethnicity	African	Unknown
Alternative name of stem cell line	ISRM-UM51	CNS705
Cell source	Renal cells isolated from urine	GM09705 fibroblasts from Coriell Institute
Method of reprogramming	Episomal-based plasmid	Episomal-based plasmid
Gene/locus	N/A	UGT1A1 c.877_890delTACATTAATGCTTCinsA (p.Tyr293Metfs) Locus: 2q37.1 (A homozygous 13 base pair deletion within the exon 2 of UGT1A1 followed by a C>A substitution)
Associated Disease	None	Crigler-Najjar Syndrome Type 1
Ethical Approval	Ethical committee of the medical faculty of Heinrich Heine University, Düsseldorf, Germany Approval number: 5704	Human primary fibroblasts (GM09705) were obtained from Coriell Institute, which operates the National Institute of General Medical Sciences (NIGMS) Human Genetic Cell Repository. The NIGMS Informed Consent was obtained at time of sample collection together with the Certificate of Confidentiality from the National Institutes of Health to help ensure patient’s privacy
Reference	21	20
PMID	29035842	33485181
