# Supplementary material for: Free Bilirubin Induces Neuro-Inflammation in an Induced Pluripotent Stem Cell-Derived Cortical Organoid Model of Crigler-Najjar Syndrome
Source: Cells. 2023 Sep 14;12(18):2277. doi: 10.3390/cells12182277 (PMC10527749; doi:10.3390/cells12182277)
Supplement: Supplementary file 1 [file cells-12-02277-s001.zip › Table S2.xlsx]

## Sheet: Tabelle1
Table S 2: Composition of Cortical organoid differentiation medium.
Component	%
Neurobasal medium	50
DMEM-F-12	50
Glutamax	1
MEM NEAA	1
Pen/strep	1
ß-Mercaptoethanol	0.1
N2	0.5
B27 (without Vit A)	1
Insulin	23µM
SB431542	5µM
Dorsomorphin	0.5µM
