# Supplementary material for: Free Bilirubin Induces Neuro-Inflammation in an Induced Pluripotent Stem Cell-Derived Cortical Organoid Model of Crigler-Najjar Syndrome
Source: Cells. 2023 Sep 14;12(18):2277. doi: 10.3390/cells12182277 (PMC10527749; doi:10.3390/cells12182277)
Supplement: Supplementary file 1 [file cells-12-02277-s001.zip › Table S3.xlsx]

## Sheet:  Antibodies
Table S3: List of utilized antibodies.
Primary antibody	Application	Dilution	Company	Order no
Anti-rabbit SOX-2	IF	1:100	Cell Signaling	3579S
Anti-mouse ß3 tubulin (TUJ1)	IF	1:250	Cell Signaling	4466S
Anti-rabbit MAP2	IF	1:250	SySy	188002
Anti-guinea pig DCX	IF	1:200	Millipore	AB2253
Anti-rabbit cleaved caspase 3	IF	1:800	CST	9664S
Anti-mouse P53	WB	1:1000	CST	9283S
Anti-mouse γH2A.X	IF, WB	1:200, 1:50	CST	9718S
Anti-rabbit UGT1A1	IF, WB	1:200, 1:1000	Thermo Fisher	PA5-98229
Anti-rabbit HNF4α	IF	1:250	Abcam	92378
Anti-rabbit CYP2D6	IF	1:200	Abcam	ab185625
Anti-rabbit AFP	IF	1:200	Sigma	HPA023600
Anti-mouse Albumin	IF	1:500	Sigma	A6684-.2ml
Anti-rabbit ECAD	IF	1:100	CST	3195
Anti-mouse KI67	IF	1:200	CST	9449S
Anti-rabbit CREB	WB	1:1000	CST	9197S
Anti-rabbit Phospho CREB	WB	1:1000	CST	9198S
Anti-rabbit Phospho-P38MAPK	WB	1:1000	CST	9212S
Anti-mouse ß-Actin	WB	1:5000	CST	3700S
Anti-mouse GAPDH	WB	1:1000	Ambion/Invitrogen	AM4300
Secondary antibody	Application	Dilution	Company	Order no
Alexa 488 goat anti rabbit IgG (H+L)	IF	1:600	ThermoFisher	A11008
Alexa 555 goat anti mouse IgG (H+L)	IF	1:600	ThermoFisher	A21424
Alexa 647 goat anti guinea pig	IF	1:600	ThermoFisher	A21450
Anti-rabbit IgG, HRP-linked Antibody	WB	1:1000	CST	7074S
ECL peroxidase labelled anti mouse Antibody	WB	1:5000	GE	NA931V
