# Supplementary material for: Free Bilirubin Induces Neuro-Inflammation in an Induced Pluripotent Stem Cell-Derived Cortical Organoid Model of Crigler-Najjar Syndrome
Source: Cells. 2023 Sep 14;12(18):2277. doi: 10.3390/cells12182277 (PMC10527749; doi:10.3390/cells12182277)
Supplement: Supplementary file 1 [file cells-12-02277-s001.zip › Table S4.xlsx]

## Sheet: Tabelle1
Table S4: List of used qRT-PCR primers.
Primer	Forward 5‘→3‘	Reverse 5‘→3‘
IL-6	GGTACATCCTCGACGGCATCT	GTGCCTCTT TGCTGCTTTCAC
IL-8	GTGCAGTTTTGCCAAGGAGT	ACTTCTCCACAACCCTCTGC
TNF- α	AGAACTCACTGGGGCCTACA	AGGAAGGCCTAAGGTCCACT
P53	CAGGGCAGCTACGGTTTCC	CAGTTGGCAAAACATCTTGTTGAG
BCL2	CTTCAGGGATGGGGTGAACT	CAGCCTCCGTTATCCTGGAT
MDM2	AAACTGGGGAGTCTTGAGGG	TGCACATTTGCCTGCTCCTC
ATM	ACACTGCGCGTATAAGCCAATC	TTTTCAACCAGTTTTCCGTTACTTC
ATR	TGTTGGGCCCACTTTATGCAGC	TAGAGACGACCTGAGACGACGC
CHEK1	GGATCAGCTTTTCCCAGCCCAC	TTCTGTGAGGATCCTGGGGTGC
CHEK2	ACGGAGTTCACAACACAGCAGC	TCTACTAGTCGAAAGCGGCCCC
UGT1A1	AACTGCCTTCACCAAAATCCACT	TTGCCATAGCTTTCTTCTCTGG
VEGF	AAGGAGGAGGGCAGAATCATC	TGATGTTGGACTCCTCAGTG
SHBG	GGCTGGATGATGGGAGATGG	ATCTCGGCCTGTTTGTCCAG
NLRP3	TGTGAAACGCTCCAGCATCC	CAACATGCTGATGTGAGGCA
CREB1	GGAATCTGGAGCCGAGAACC	TGGACTTGAACTGTCTGCCC
TNFSF12	TAAAGGCCGGAAAACACGGG	GACAGCCTTCCCCTCATCAAA
AZI2	CTGGTGACTCAAGTACAAGCTG	CTTCACTGCATCCTACAGGGG
MyD88	CCACACTTGATGACCCCCTG	ATCAGAGACAACCACCACCA
RPL0	TCGACAATGGCAGCATCTAC	ATCCGTCTCCACAGACAAGG
